# Supplementary material for: Greenland Ice Sheet Surface Runoff Projections to 2200 Using Degree-Day Methods
Source: MDPI journal article supplement (doi:10.3390/atmos12121569), 2021-11-26
Supplement: s1 [file s1]

Supplementary

# Greenland Ice Sheet Surface Runoff Projections to 2200 Using Degree-Day Methods

Chao Yue <sup>1</sup>, Liyun Zhao <sup>1,2,\*</sup>, Michael Wolovick <sup>1,3</sup> and John C. Moore <sup>1,4,5</sup>

<sup>1</sup> College of Global Change and Earth System Science, Beijing Normal University, Beijing 100875, China  
yuechao.bnu@gmail.com (C.Y.); michael.wolovick@gmail.com (M.W.); john.moore.bnu@gmail.com (J.C.M.)

<sup>2</sup> Southern Marine Science and Engineering Guangdong Laboratory, Zhuhai 510301, China

<sup>3</sup> Alfred Wegener Institute, 27568 Bremerhaven, Germany

<sup>4</sup> CAS Center for Excellence in Tibetan Plateau Earth Sciences, Beijing 100101, China

<sup>5</sup> Arctic Centre, University of Lapland, 96101 Rovaniemi, Finland

\* Correspondence: zhaoliyun@bnu.edu.cn

## Introduction

Supporting Fig.S1 shows the downscaled and bias-corrected snowfall by individual ESM under RCP4.5 and RCP8.5 scenarios over Greenland ice sheet. Fig.S2–S4 and Table S1 mainly show the comparison between modeled and observed near-surface air temperature and AWS position over Greenland ice sheet.

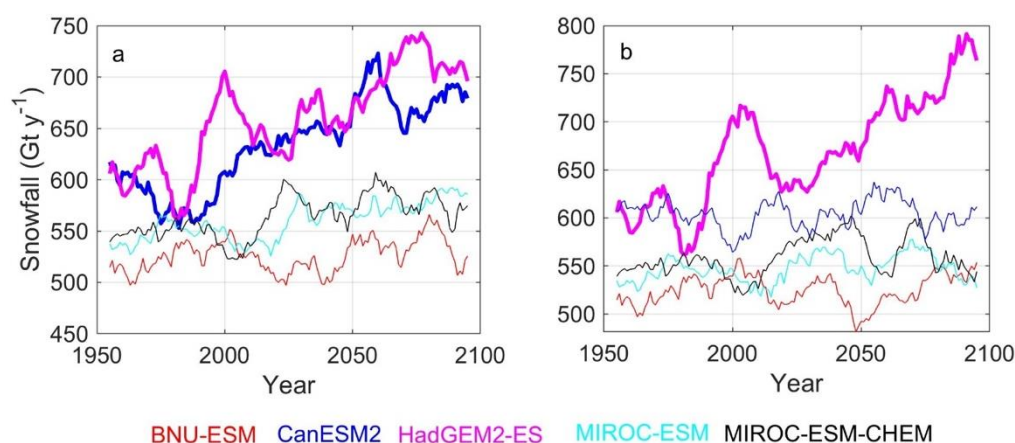

**Figure S1.** Downscaled and bias-corrected snowfall from BNU-ESM (red), CanESM2 (blue), HadGEM2-ES (magenta), MIROC-ESM (cyan) and MIROC-ESM-CHEM (black) under RCP4.5(a) and RCP8.5 (b) during 1950–2100. Thick curves indicate that significant trend in snowfall through Mann-Kendall test at 95% level.

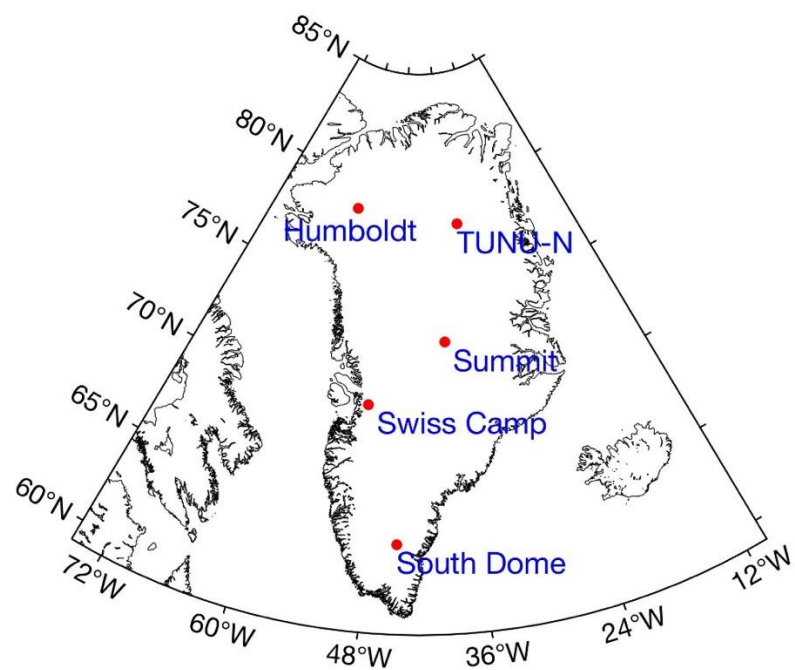

**Figure S2.** Map of AWS observations over GrIS.

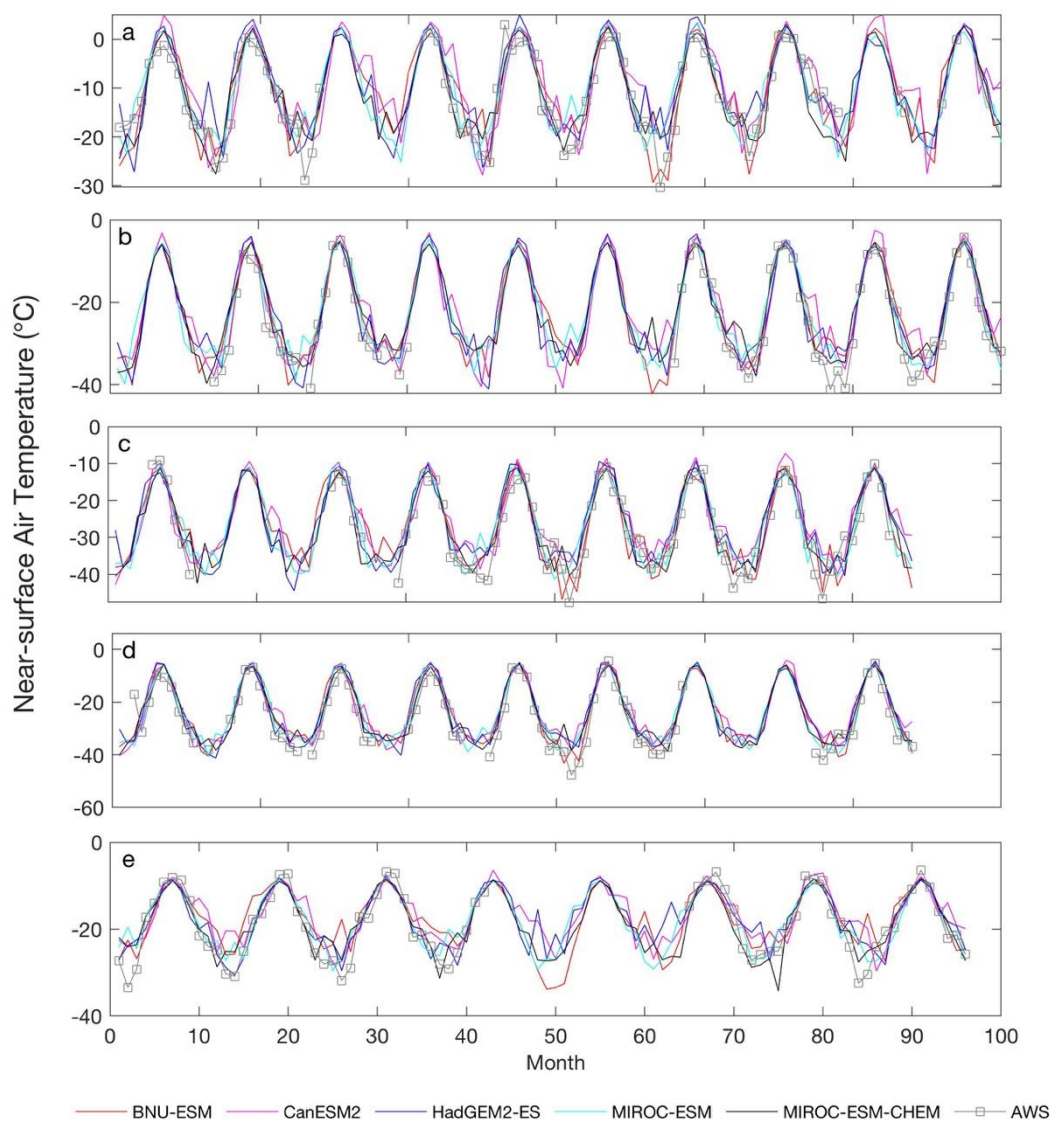

**Figure S3.** Historical monthly near-surface air temperature over GrIS site Swiss Camp (a), Humboldt (b), Summit (c), TUNU-N (d) and South Dome (e) from BNU-ESM (red), CanESM2 (magenta), HadGEM2-ES (blue), MIROC-ESM (cyan), MIROC-ESM-CHEM (black) and AWS observation (gray). ESMs are downscaled and bias-corrected by ISI-MIP. Note that Swiss Camp and Humboldt are during the period of 1996–2005, Summit and TUNU-N are 1997–2005, South Dome is 1998–2005.

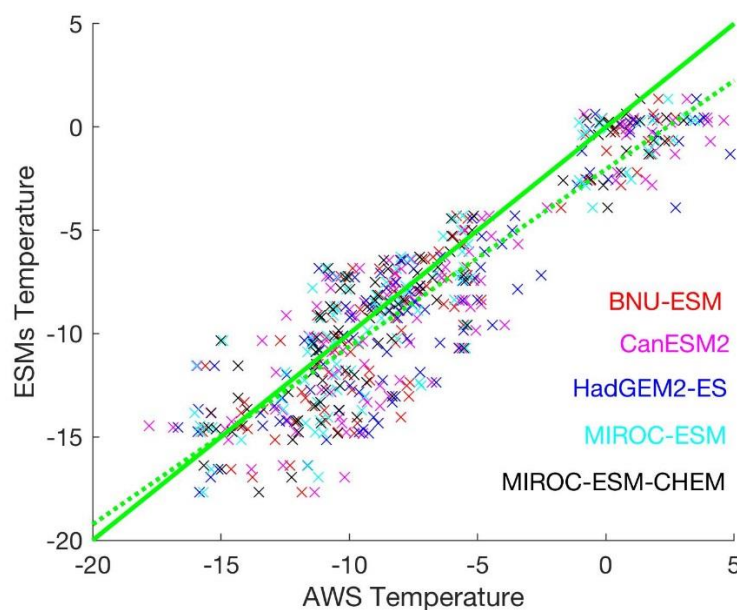

**Figure S4.** Scatter plot of historical summer season (JJA) monthly mean near-surface air temperature ( $^{\circ}\text{C}$ ) that downscaled and bias-corrected from BNU-ESM (red), CanESM2 (magenta), HadGEM2-ES (blue), MIROC-ESM (cyan) and MIROC-ESM-CHEM (black) versus that observed by AWS over GrIS site Swiss Camp, Humboldt, Summit, TUNU-N and South Dome. Solid green line shows the one-to-one line and dotted line shows linear fitted line by 5 ESMs. Note that temperatures at Swiss Camp and Humboldt were observed during the period 1996–2005, Summit and TUNU-N 1997–2005, South Dome 1998–2005.

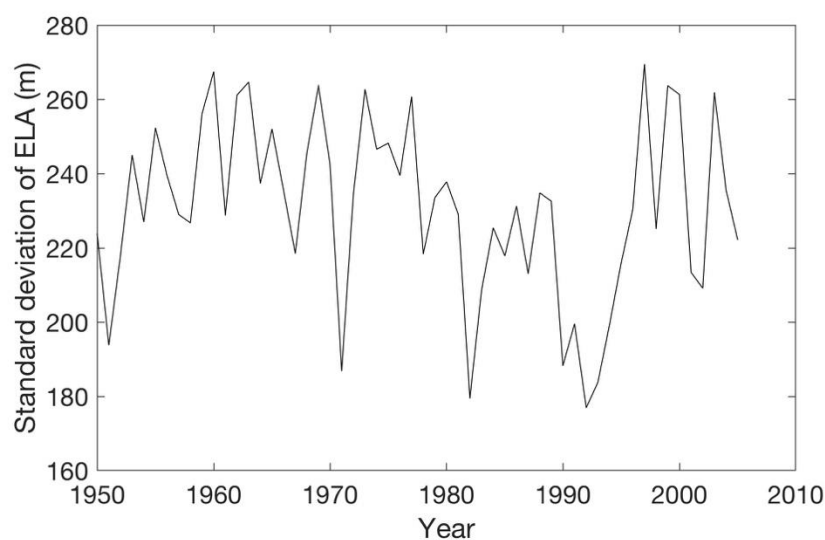

**Figure S5.** Annual standard deviation of ELA over GrIS modeled by SEMIC from ensemble mean of BNU-ESM, HadGEM2-ES, MIROC-ESM, MIROC-ESM-CHEM and CanESM2.

**Table S1.** AWS position over GrIS.

| <b>Station Name</b> | <b>Latitude</b> | <b>Longitude</b> | <b>Elevation (m)</b> |
|---------------------|-----------------|------------------|----------------------|
| Swiss Camp          | 69° 34' 06" N   | 49° 18' 57" W    | 1149                 |
| Humboldt            | 78° 31' 36" N   | 56° 49' 50" W    | 1995                 |
| Summit              | 72° 34' 47" N   | 38° 30' 16" W    | 3254                 |
| TUNU-N              | 78° 01' 0" N    | 33° 59' 38" W    | 2113                 |
| South Dome          | 63° 08' 56" N   | 44° 49' 00" W    | 2922                 |
